# Supplementary material
Source: PubMed Central journal article supplement (PMC6535147)
Supplement: NIHMS1021652-supplement-Graphical_Abstract.pdf [file NIHMS1021652-supplement-Graphical_Abstract.pdf]

# Adipocyte – Preadipocyte Transition

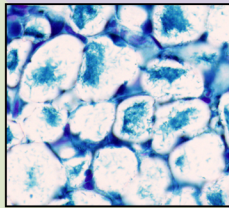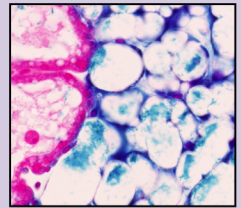

Pregnancy

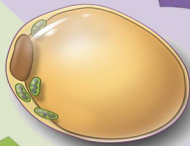

Adipocyte

De-differentiation

Preadipocyte

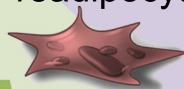

Re-differentiation

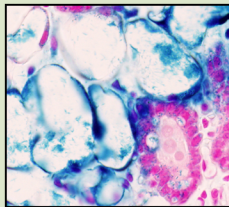

Involution

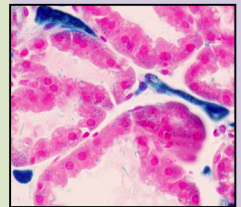

Lactation
