# Supplementary material
Source: PubMed Central journal article supplement (PMC6535147)
Supplement: NIHMS1021652-supplement-S_Fig_1__2.pdf [file NIHMS1021652-supplement-S_Fig_1__2.pdf]

**Cell Metabolism, Volume 28**

**Supplemental Information**

**Reversible De-differentiation of Mature**

**White Adipocytes into Preadipocyte-like Precursors**

**during Lactation**

**Qiong A. Wang, Anying Song, Wanze Chen, Petra C. Schwalie, Fang Zhang, Lavanya Vishvanath, Lei Jiang, Risheng Ye, Mengle Shao, Caroline Tao, Rana K. Gupta, Bart Deplancke, and Philipp E. Scherer**

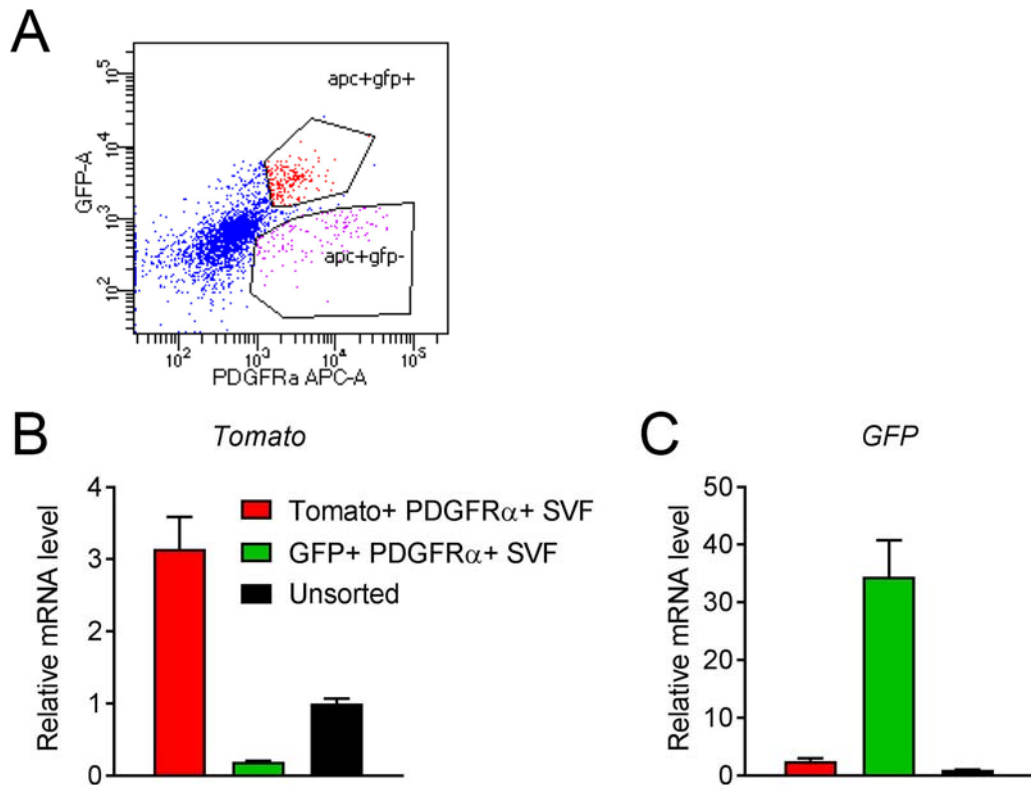

**Supplemental Figure 1. FACS sorting of the de-differentiated mammary adipocytes (related to Figure 4)**

(A) FACS sorting of the de-differentiated mammary adipocytes (CD31<sup>-</sup>/CD45<sup>-</sup>/PDGFR $\alpha$ <sup>+</sup>/GFP<sup>+</sup> cells) from the mammary gland SVFs of lactating females. (B, C) qPCR analysis shows the mRNA expression levels of *Tomato* (B) and *GFP* (C) in the sorted CD31<sup>-</sup>/CD45<sup>-</sup>/PDGFR $\alpha$ <sup>+</sup>/Tomato<sup>+</sup> and CD31<sup>-</sup>/CD45<sup>-</sup>/PDGFR $\alpha$ <sup>+</sup>/GFP<sup>+</sup> cells from the mammary gland SVFs of lactating females.  $n = 2$  sorted cell samples.

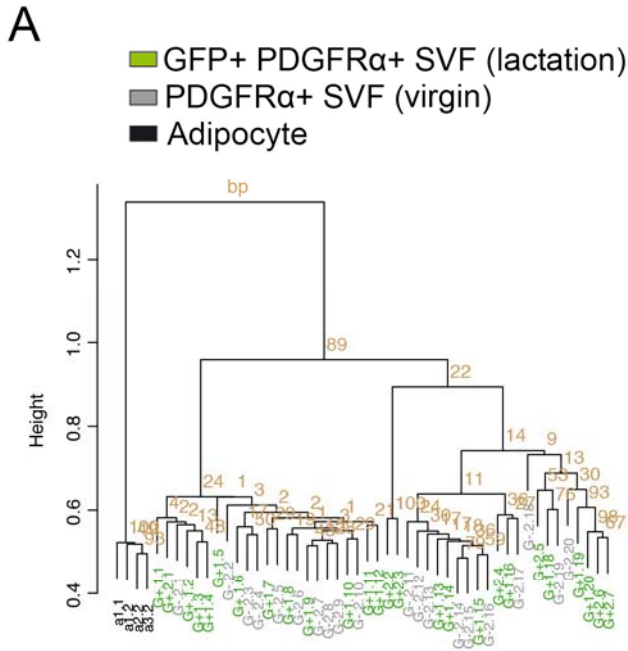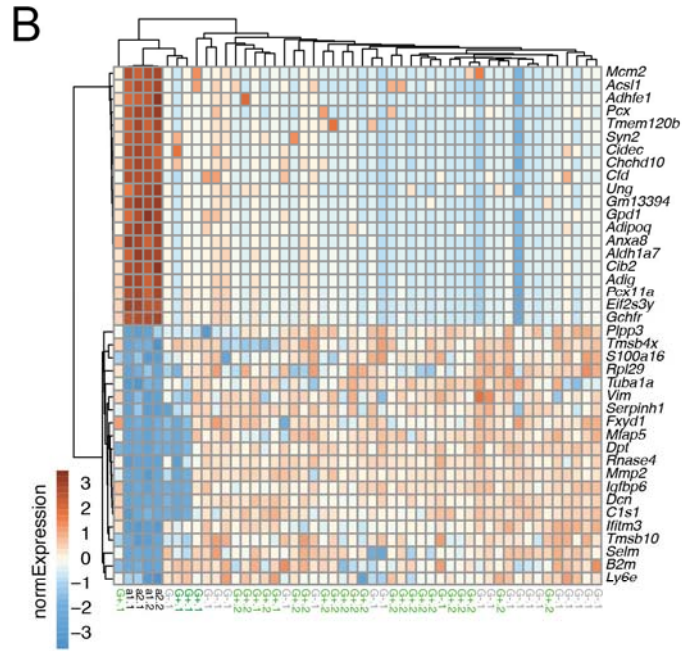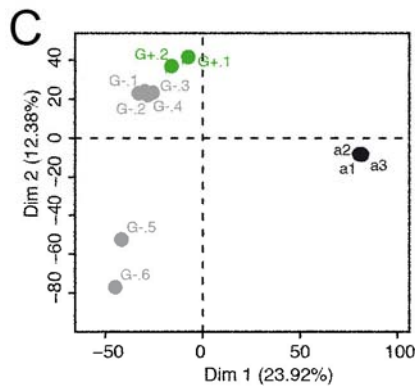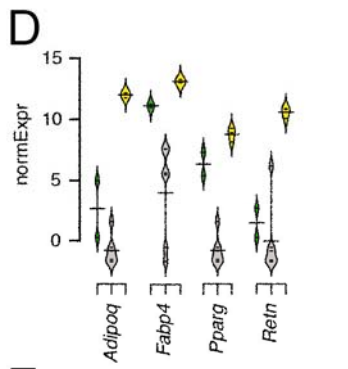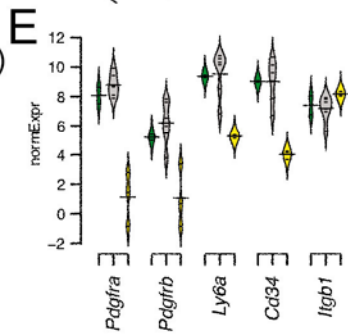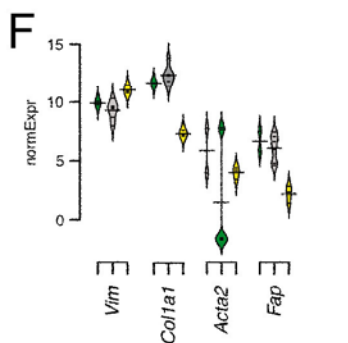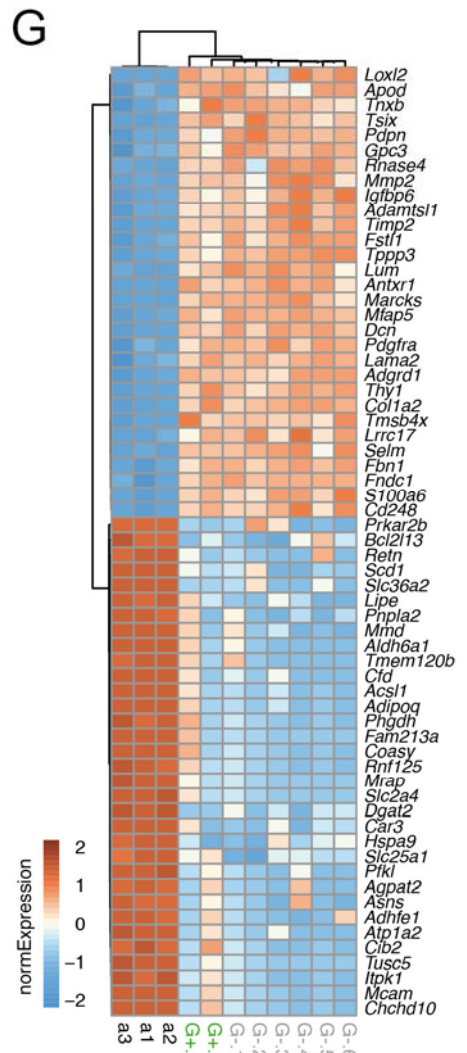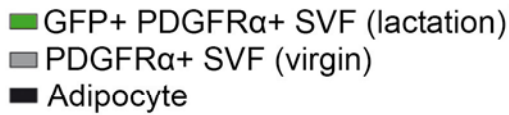

**Supplemental Figure 2. Sample clustering and expression overview of GFP positive, negative, and mature adipocyte control samples from single-cell and population RNA-seq analysis (related to Figure 4)**

(A) Overview of single-cell clustering of 26 de-differentiated mammary adipocytes (CD31<sup>-</sup>/CD45<sup>-</sup>/PDGFR $\alpha$ <sup>+</sup>/GFP<sup>+</sup> cells) from the mammary gland SVFs of lactating females, 20 classic preadipocytes (CD31<sup>-</sup>/CD45<sup>-</sup>/PDGFR $\alpha$ <sup>+</sup> cells) from the mammary gland SVFs of virgin females, and 4 brown adipocytes by hierarchical clustering. BP – bootstrap probability value (a, black). (B) Heat map of the expression (row-wise z-scores of log<sub>cpm</sub>, blue to red) of top 20 genes significantly up- and downregulated, respectively (FDR 0.05, FC 2) in both GFP<sup>+</sup>, and GFP<sup>-</sup> versus mature adipocytes, as assessed by single-cell RNA-seq. (C) Overview of sample grouping by principal component analysis (population GFP<sup>+</sup>, GFP<sup>-</sup> and mature adipocyte samples, normExpr). (D-F) Beanplots showing the distribution of normalized expression values across samples that belong to one of these three categories of common adipocyte markers (D), common preadipocyte markers (E) and common fibroblast markers (F). (G) Heat map of the expression (row-wise z-scores of log<sub>cpm</sub>, normExpr, blue to red) of top 20 genes significantly up- and down-regulated, respectively (FDR 0.1, FC 2) in both GFP<sup>+</sup> and GFP<sup>-</sup> versus mature adipocytes, as assessed by both population and single-cell RNA-seq (intersection).
